# Supplementary material for: Cellular aspect ratio and cell division mechanics underlie the patterning of cell progeny in diverse mammalian epithelia
Source: eLife journal article supplement (doi:10.7554/elife.36739), 2018-06-13
Supplement: supp [file elife-36739-supp-v1.zip]

Archive with 27 entries (27 files):
- elife_poa_e36739_Figure_2_video_8.mov
- elife_poa_e36739_Figure_3_video_3.mov
- elife_poa_e36739_Figure_2_video_4.mov
- elife_poa_e36739_Transparent_Reporting_File.pdf
- elife_poa_e36739_Figure_3_video_1.mov
- elife_poa_e36739_Figure_2_video_10.mov
- elife_poa_e36739_Figure_2_video_6.mov
- elife_poa_e36739_Figure_2_video_11.mov
- elife_poa_e36739_Figure_2_video_2.mov
- elife_poa_e36739_Video_1.mov
- elife_poa_e36739_Figure_2_video_7.mov
- elife_poa_e36739_Figure_2_video_9.mov
- elife_poa_e36739_Figure_1_video_2.mov
- elife_poa_e36739_Video_3.mov
- elife_poa_e36739_Figure_2_video_3.mov
- elife_poa_e36739_Video_4.mov
- elife_poa_e36739_Figure_2_video_13.mov
- elife_poa_e36739_Figure_2_video_5.mov
- elife_poa_e36739_Figure_2_figure_supplement_1.pdf
- elife_poa_e36739_Video_2.mov
- elife_poa_e36739_Figure_3_figure_supplement_1.pdf
- elife_poa_e36739_Figure_2_video_12.mov
- elife_poa_e36739_Figure_3_video_2.mov
- elife_poa_e36739_Figure_1_figure_supplement_1.pdf
- elife_poa_e36739_Figure_2_video_1.mov
- elife_poa_e36739_Figure_1_video_1.mov
- elife_poa_e36739_Figure_4_figure_supplement_1.pdf
