# Supplementary material for: Cellular aspect ratio and cell division mechanics underlie the patterning of cell progeny in diverse mammalian epithelia
Source: eLife journal article supplement (doi:10.7554/elife.36739), 2018-06-13

# **A Stem + Absorptive lineage**

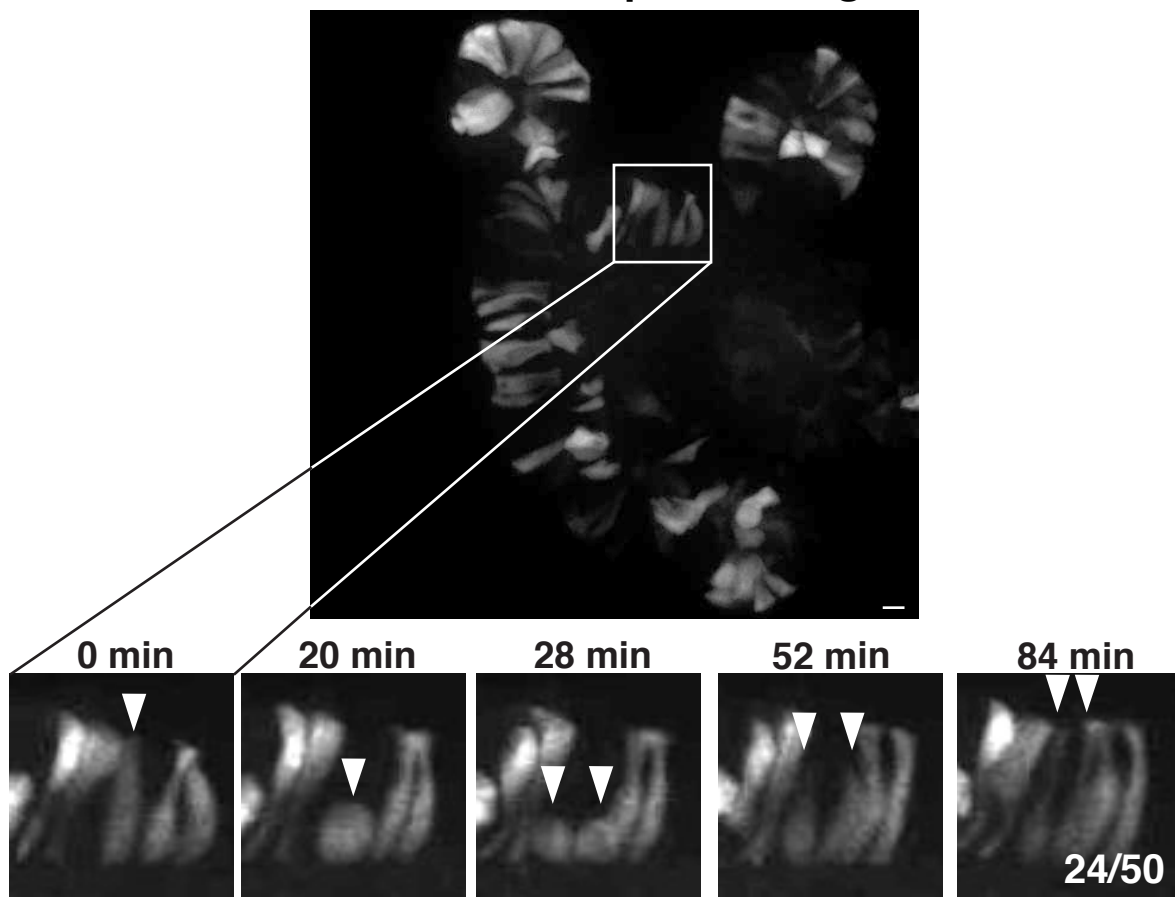

# **Basal surface**

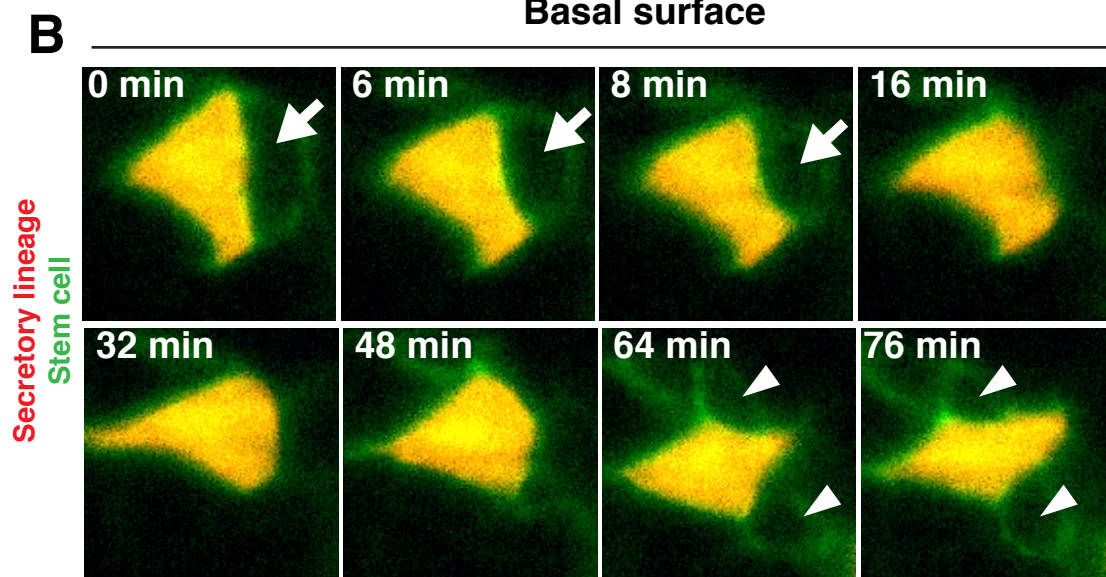

# **C**

## **Secretory lineage**

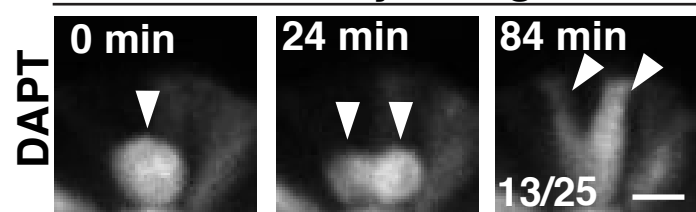

# **D**

## **Secretory lineage**

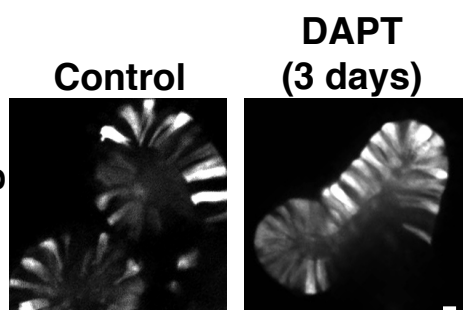

# **E**

## **Secretory lineage**

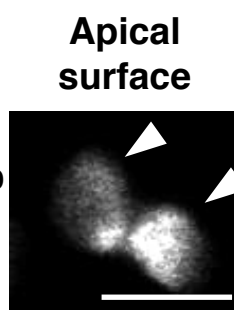

Supplement: supp [file elife-36739-supp-v1.zip › elife_poa_e36739_Figure_1_figure_supplement_1.pdf]
