# Supplementary figures and images for: Cellular aspect ratio and cell division mechanics underlie the patterning of cell progeny in diverse mammalian epithelia
Source: eLife journal article supplement (doi:10.7554/elife.36739), 2018-06-13

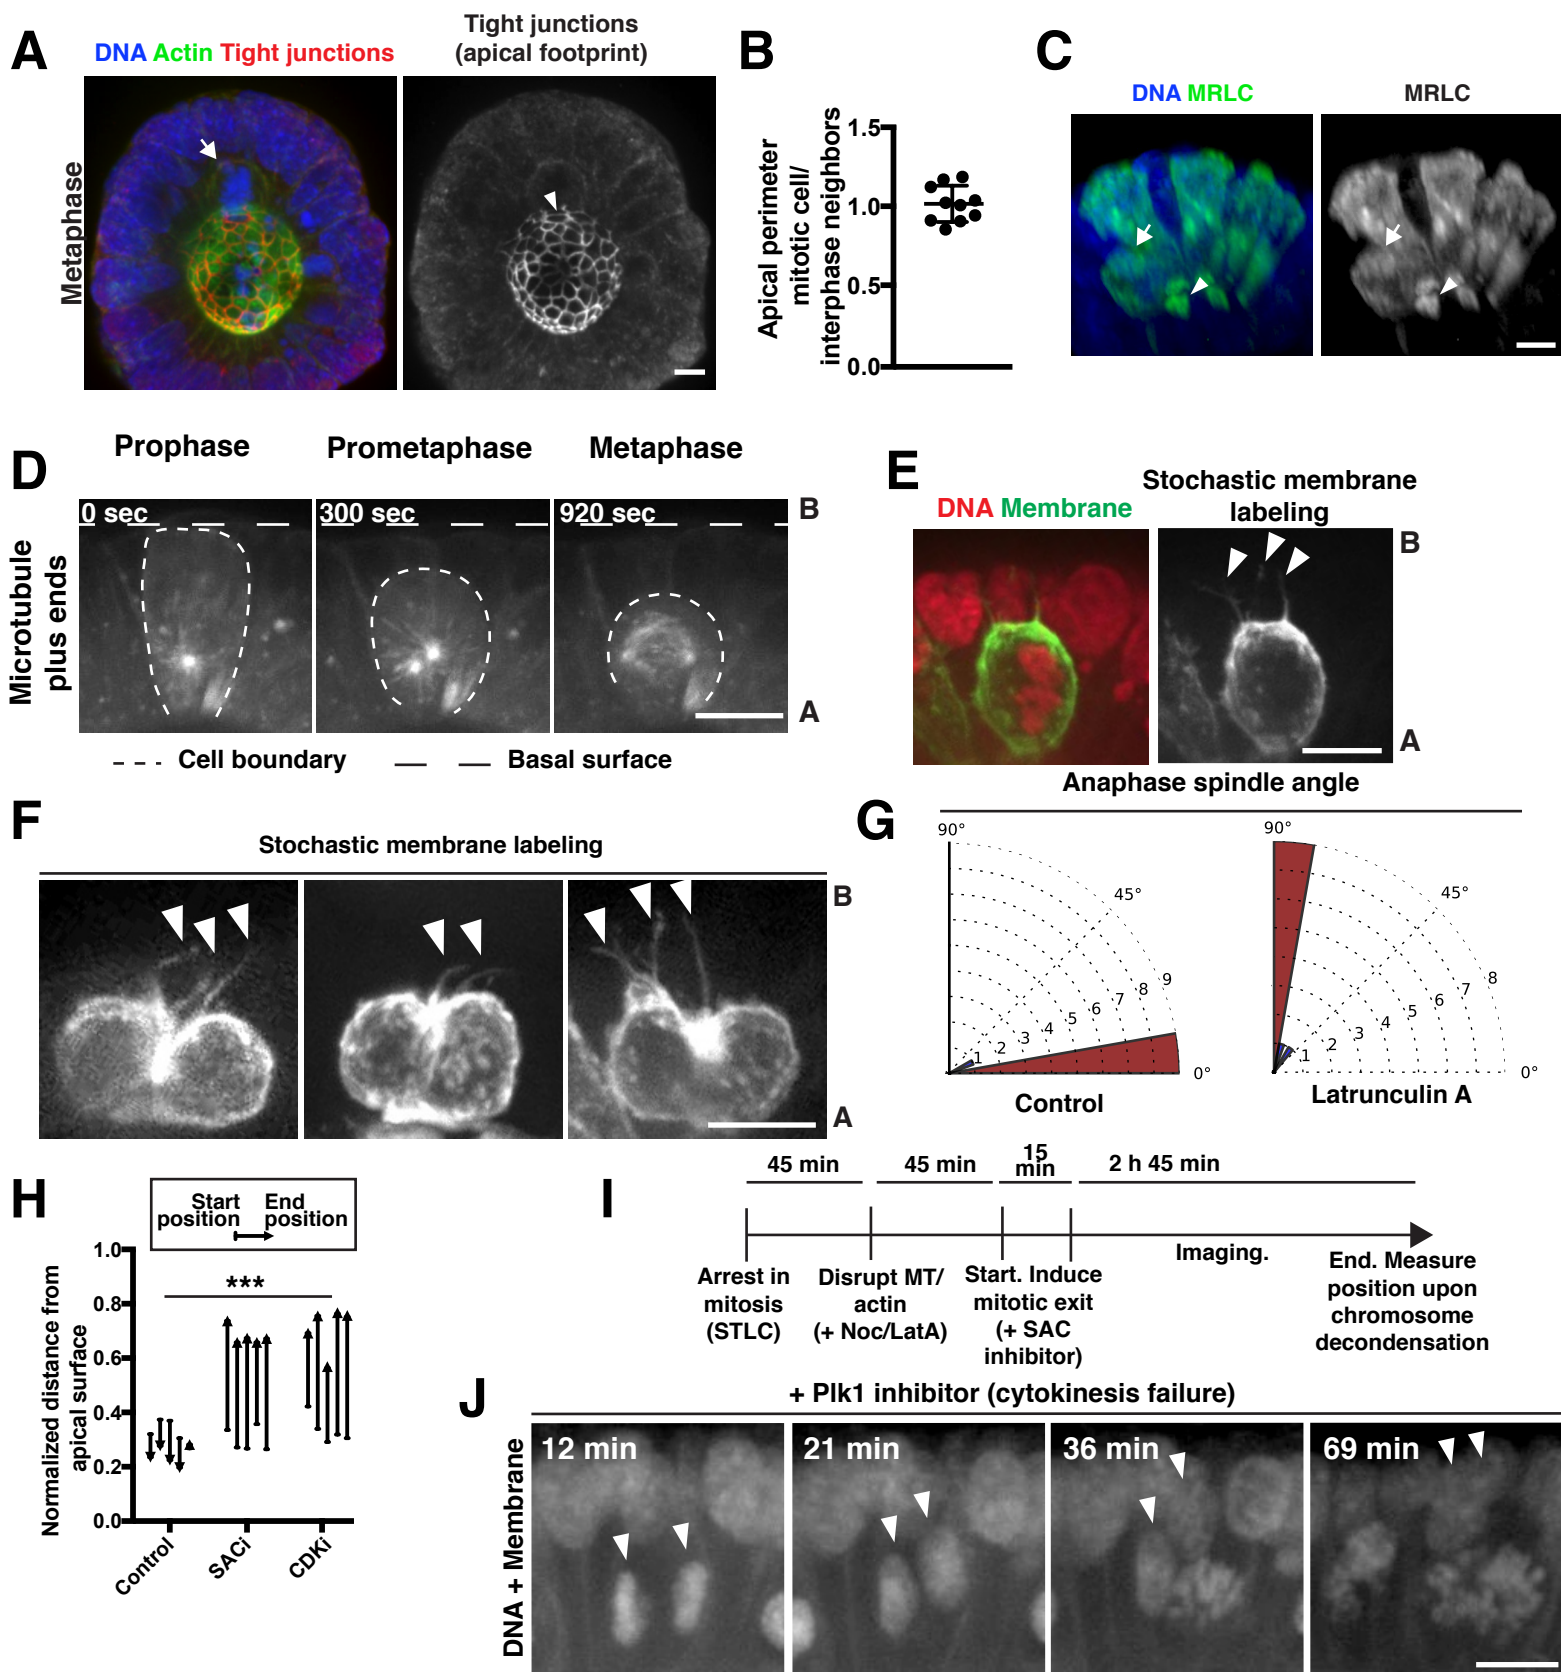

Supplement: supp [file elife-36739-supp-v1.zip › elife_poa_e36739_Figure_2_figure_supplement_1.pdf]

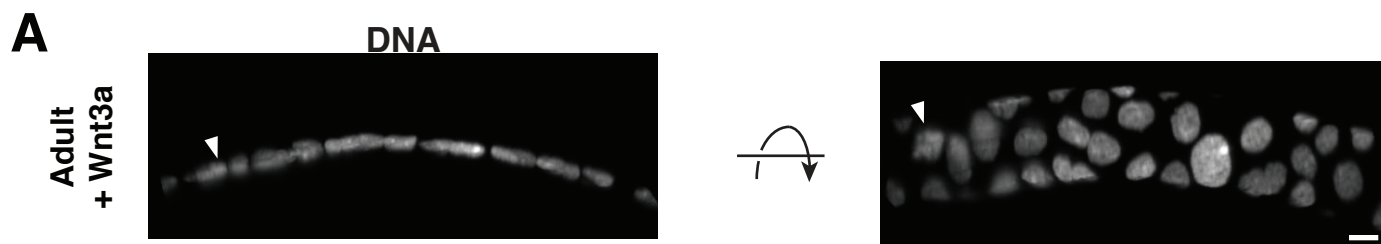

**B**

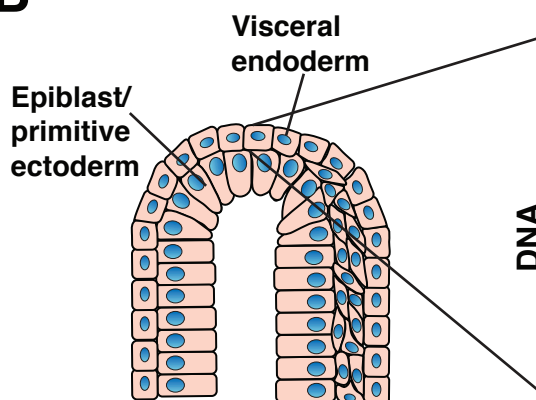

Visceral endoderm (top-down view of embryo surface)

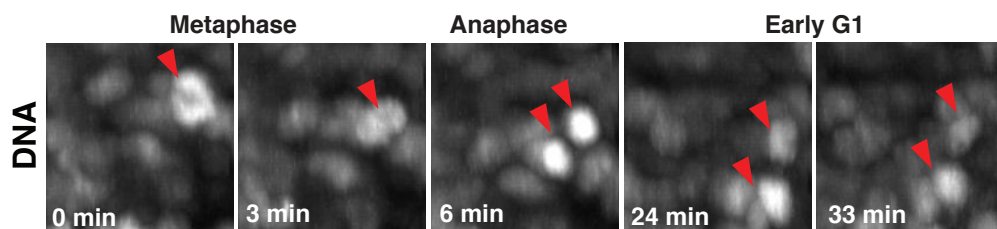

Supplement: supp [file elife-36739-supp-v1.zip › elife_poa_e36739_Figure_3_figure_supplement_1.pdf]

**Vertebrate  
cytokinesis**

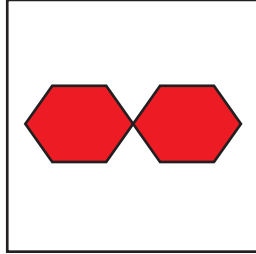

**Drosophila  
cytokinesis**

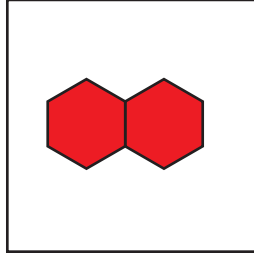

Supplement: supp [file elife-36739-supp-v1.zip › elife_poa_e36739_Figure_4_figure_supplement_1.pdf]
